# Supplementary material for: Training general practitioners contributes to the identification of palliative patients and to multidimensional care provision: secondary outcomes of an RCT
Source: PubMed Central journal article supplement — BMJ Support Palliat Care. 2016 Apr 18;9(1):e18. doi: 10.1136/bmjspcare-2015-001031 (PMC6579494; doi:10.1136/bmjspcare-2015-001031), 2016-04-18
Supplement: bmjspcare-2015-001031supp001.pdf [file bmjspcare-2015-001031supp001.pdf]

Appendix 1: RADPAC tool to timely identify palliative patients with cancer, COPD or CHF

|                                                     |                                                                                                                                                                                                                                                                                                                                                                                                                                                                                                                                                                                                                                                                                      |
|-----------------------------------------------------|--------------------------------------------------------------------------------------------------------------------------------------------------------------------------------------------------------------------------------------------------------------------------------------------------------------------------------------------------------------------------------------------------------------------------------------------------------------------------------------------------------------------------------------------------------------------------------------------------------------------------------------------------------------------------------------|
| <p>Chronic Obstructive Pulmonary Disease (COPD)</p> | <ol style="list-style-type: none"> <li>1. Moderately disabled; dependent. Requires considerable assistance and frequent care (Karnofsky-score <math>\leq 50\%</math>)</li> <li>2. Substantial weight loss (<math>\pm 10\%</math> loss of bodyweight in six months)</li> <li>3. presence of congestive heart failure</li> <li>4. Orthopnoea</li> <li>5. Patient gives signals of approaching end of life</li> <li>6. Objective signs of serious dyspnoea (decreased dyspnoea d' effort, dyspnoea with speaking, use of respiratory assistant muscles and orthpnoea)</li> </ol>                                                                                                        |
|                                                     |                                                                                                                                                                                                                                                                                                                                                                                                                                                                                                                                                                                                                                                                                      |
| <p>Congestive heart failure (CHF)</p>               | <ol style="list-style-type: none"> <li>1. Severe limitations. Experiences symptoms even while at rest. Mostly bedbound patients. (NYHA IV)</li> <li>2. Frequent hospital admissions (&gt;3 per year)</li> <li>3. Frequent acute decompensated heart failure (&gt;3 per jaar)</li> <li>4. Moderately disabled; dependent. Requires considerable assistance and frequent care (Karnofsky-score <math>\leq 50\%</math>)</li> <li>5. Increase in weight which does not react on raising the amount of diuretics</li> <li>6. Algehele achteruitgang in clinical situation (oedema, orthopnoe, nycturie, dyspnoea)</li> <li>7. Patient gives signals of approaching end of life</li> </ol> |
|                                                     |                                                                                                                                                                                                                                                                                                                                                                                                                                                                                                                                                                                                                                                                                      |
| <p>Oncology</p>                                     | <ol style="list-style-type: none"> <li>1. Worse prognosis primary tumor</li> <li>2. Moderately disabled; dependent. Requires considerable assistance and frequent care (Karnofsky-score <math>\leq 50\%</math>)</li> <li>3. Progressively decline in physical functioning</li> <li>4. Progressively bedridden</li> <li>5. Diminished voedsel intake</li> <li>6. Toenemende vermagering</li> <li>7. Anorexie-cachexie syndrom (afname eetlust, algemene zwakte, vermagering, spieratrofie)</li> <li>8. Diminished 'drive to live'</li> </ol>                                                                                                                                          |
|                                                     |                                                                                                                                                                                                                                                                                                                                                                                                                                                                                                                                                                                                                                                                                      |

Appendix 2: Problems square to make a multidimensional inventory of actual and future problems

**PROBLEMS SQUARE**

|                                               |  |                                             |  |
|-----------------------------------------------|--|---------------------------------------------|--|
| <b>Somatic</b>                                |  | <b>Social context and finances</b>          |  |
| Policy                                        |  | Policy                                      |  |
| Actual problems:                              |  | Actual problems:                            |  |
| Expected problems:                            |  | Expected problems:                          |  |
| Dying scenario:                               |  | Dying scenario:                             |  |
| <b>Caregiving and daily living activities</b> |  | <b>Existential and psychological issues</b> |  |
| Policy                                        |  | Policy                                      |  |
| Actual problems:                              |  | Actual problems:                            |  |
| Expected problems:                            |  | Expected problems:                          |  |
| Dying scenario:                               |  | Dying scenario:                             |  |

|                           |                                                                                      |
|---------------------------|--------------------------------------------------------------------------------------|
| Possible future problems: |  |
| Disease specific aspects: |                                                                                      |
